# Supplementary material for: How is particulate organic carbon transported through the river-fed submarine Congo Canyon to the deep sea?
Source: Copernicus journal article supplement (doi:10.5194/bg-21-4251-2024), 2024-09-30
Supplement: Supplementary file 1 [file bg-21-4251-2024-supplement.pdf]

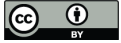

*Supplement of*

## **How is particulate organic carbon transported through the river-fed submarine Congo Canyon to the deep sea?**

**Sophie Hage et al.**

*Correspondence to:* Sophie Hage ([sophie.hage@hotmail.com](mailto:sophie.hage@hotmail.com))

The copyright of individual parts of the supplement might differ from the article licence.

## Supplementary Material

Hage et al. (2024, Biogeosciences): How is particulate organic carbon transported through the river-fed Congo Submarine Canyon to the deep-sea?

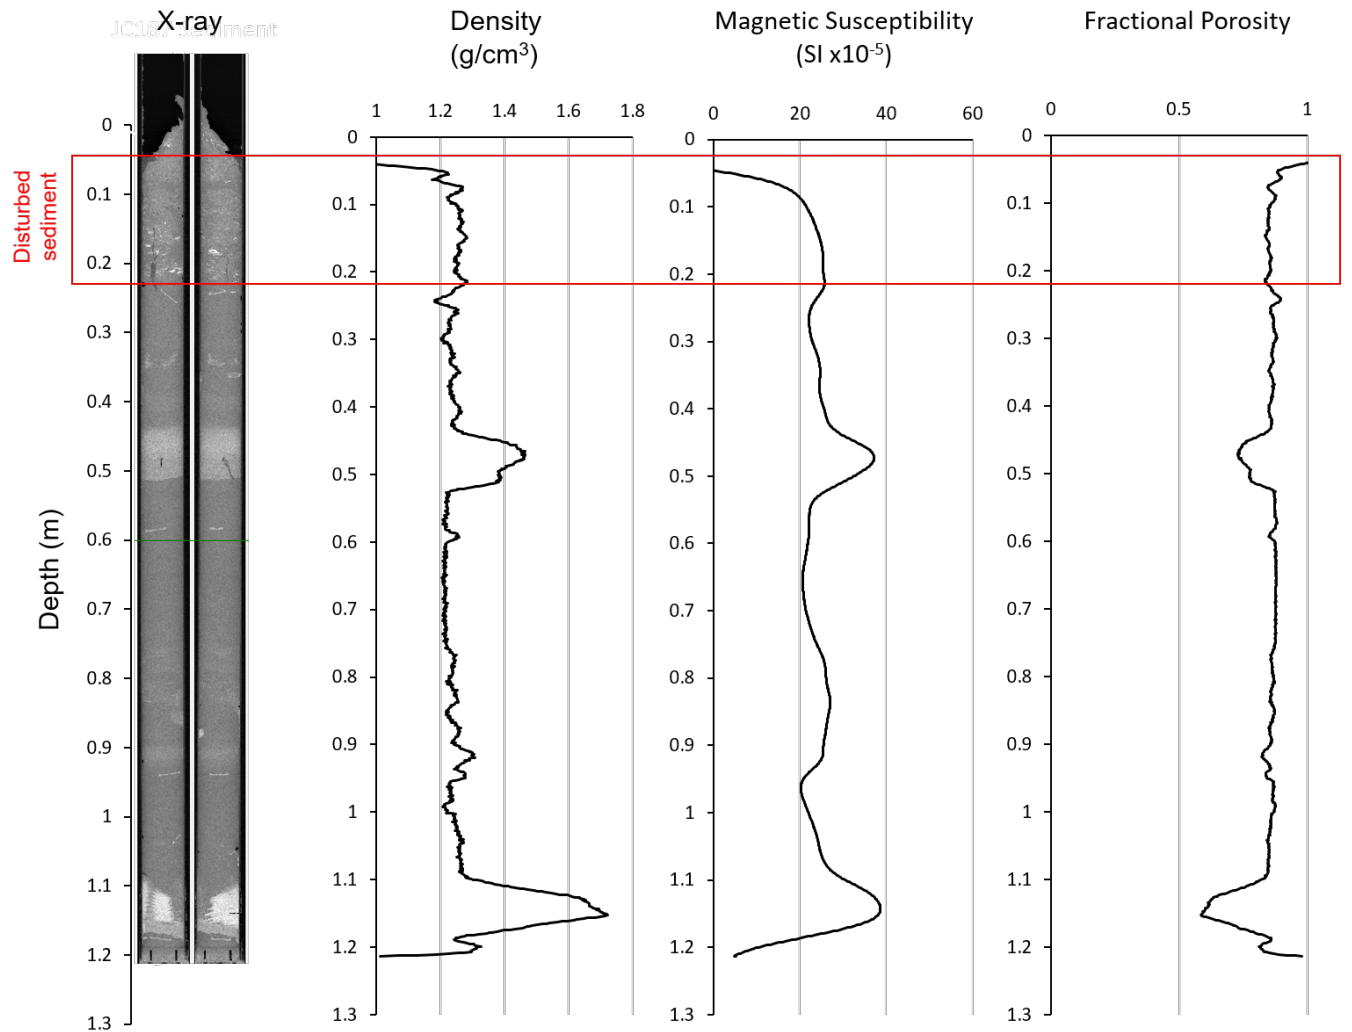

Figure S1. X-ray photograph of the sediment trap cut in half and data collected using a Multi-Sensor-Core-Logger on the sediment trap

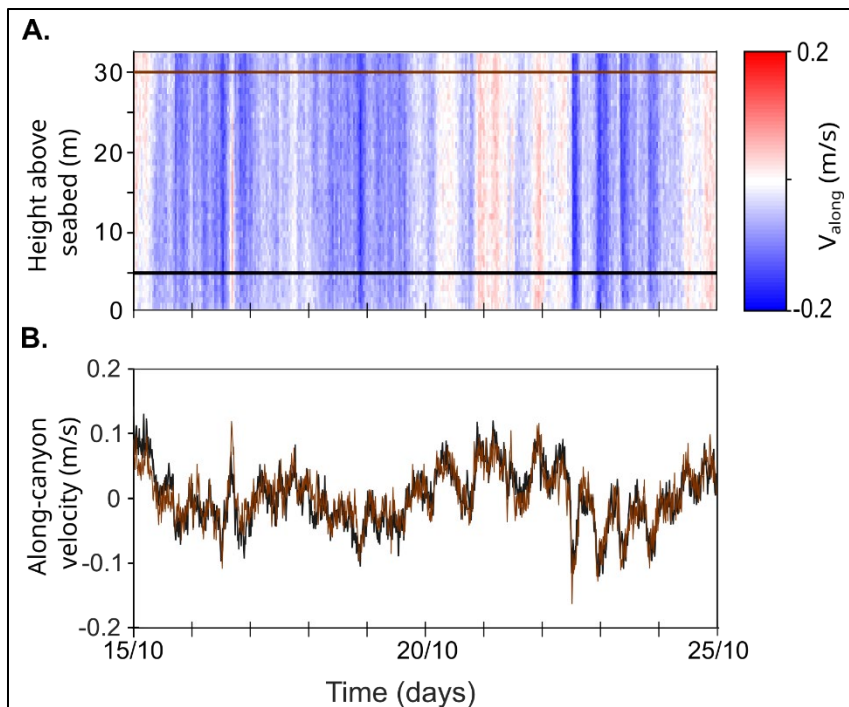

**Figure S2: Velocity along canyon ( $V_{\text{along}}$ ) and frequency analysis for the period 15<sup>th</sup> to 25<sup>th</sup> October 2019 (see Fig. 2A in the main manuscript for context). A.** Time series of  $V_{\text{along}}$  between 15<sup>th</sup> October and 25<sup>th</sup> October 2019. The brown and black horizontal lines indicate the locations of the arrays displayed in B. **B.**  $V_{\text{along}}$  speeds at 5 and 30 m above canyon floor.

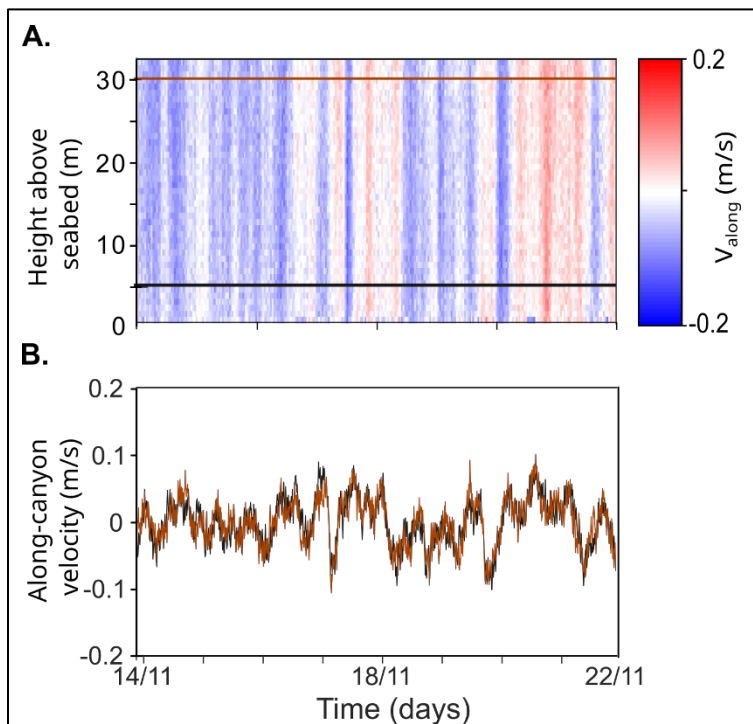

**Figure S3: Velocity along canyon ( $V_{\text{along}}$ ) and frequency analysis for the period 14<sup>th</sup> to 22<sup>nd</sup> November 2019 (see Fig. 2A in the main manuscript for context). A.** Time series of  $V_{\text{along}}$  between 14<sup>th</sup> and 22<sup>nd</sup> November 2019. The brown and black horizontal lines indicate the locations of the arrays displayed in B. **B.**  $V_{\text{along}}$  speeds at 5 and 30 m above canyon floor.
